# Supplementary material for: Photovoltaic and electrocatalytic properties of novel ball-type phthalocyanines bridged with four dicumarol
Source: Royal Society of Chemistry journal article supplement (doi:10.1039/c2dt12510b), 2012-01-01
Supplement: c2dt12510b.pdf [file c2dt12510b.pdf]

## Supplementary Information

### Photovoltaic and Electrocatalytic Properties of Novel Ball-Type Phthalocyanines Bridged with four Dicumarol

Ümit Salan,\* Ahmet Altındal, Ali Rıza Özkaya, Bekir Salih, and Özer Bekaroğlu\*

#### Figures of Contents

Figure S1 Absorption spectra of **4** and **5** in DMSO -----S2

Figure S2 <sup>1</sup>H-NMR spectrum of compound **5** in DMF -----S2

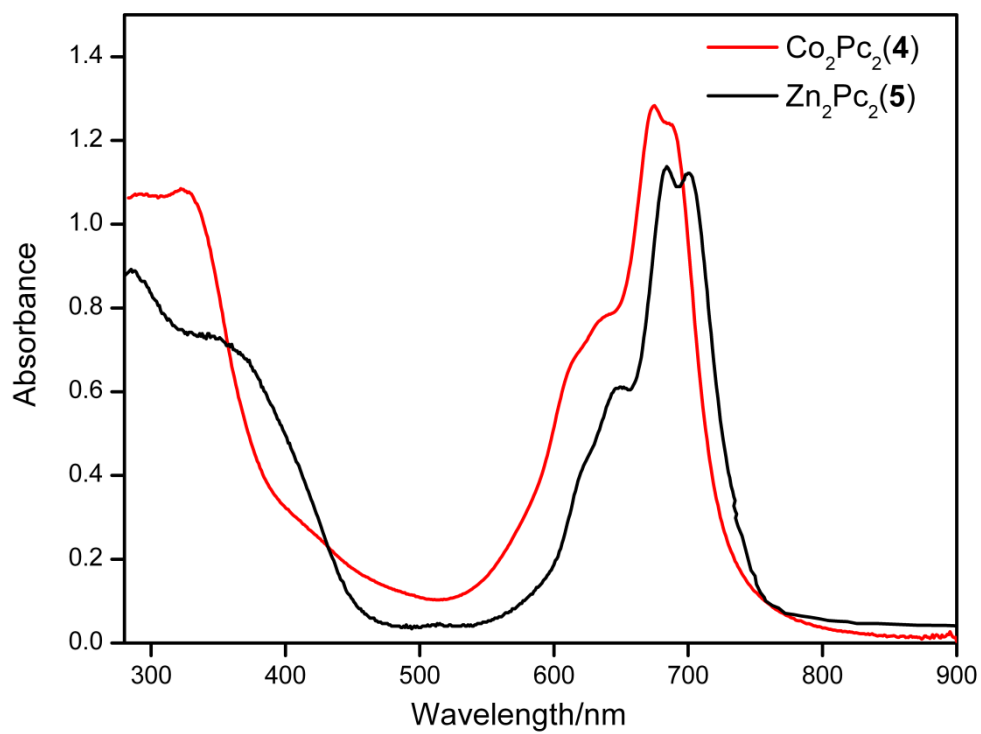

Fig. S1. Absorption spectra of  $5.0 \times 10^{-5}$  M compound 4 and 5 in DMSO

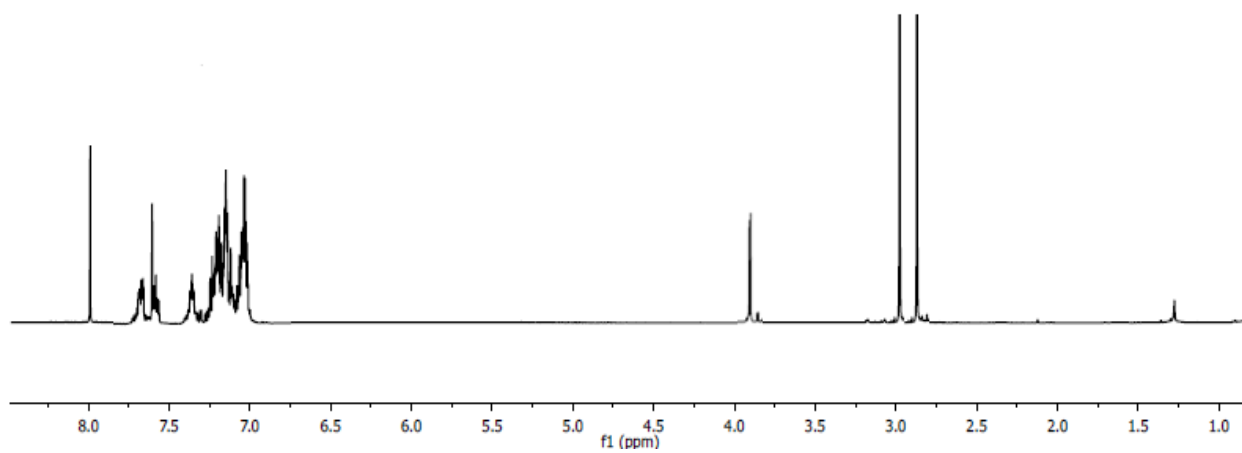

Fig. S2. <sup>1</sup>H-NMR spectrum of compound 5 in DMF.
